# Supplementary material for: MXene-derived TiO2 nanoparticles coated with C/N shell for photocatalytic hydrogen generation under solar light
Source: Research Square preprint supplement (doi:10.21203/rs.3.rs-5866238/v1), 2025-04-18
Supplement: Supplementary file 1 [file 5c200af994a82e080c1396b1.docx]

**Supporting Information**

**MXene-derived TiO­2 nanoparticles coated with C/N shell for photocatalytic hydrogen generation under solar light**

Daria Baranowska1,2*, Bartosz Środa1,2, Tomasz Kędzierski1,2, Zhang Bowen3, Liu Xiaoguang3, Ewa Mijowska1,2*, Beata Zielińska1,2

1Department of Nanomaterials Physicochemistry, Faculty of Chemical Technology and Engineering, West Pomeranian University of Technology in Szczecin, Piastow Ave. 42,
71-065 Szczecin, Poland

2Center for Advanced Materials and Manufacturing Process Engineering (CAMMPE), West Pomeranian University of Technology in Szczecin, Szczecin, Poland

3School of Chemistry and Materials Science, Shandong Agricultural University, Shandong, China

Corresponding authors: *[daria_baranowska@zut.edu.pl](mailto:daria_baranowska@zut.edu.pl), emijowska@zut.edu.pl

**Materials and Methods**

*Preparation of MXene – 48% HF*

The synthesis of MXene – 48% HF followed the same procedure as the fabrication of MXene described in the manuscript, except that 40% HF was replaced with 48% HF.

*Preparation of C/N@TiO2 – 48% HF*

The sample was prepared by mixing 5wt% MXene – 48% HF with 95wt% gCN, followed by grinding the mixture using a mortar and subsequently heating it at 600 ℃ for 4 hours under air conditions using a muffle furnace.

**Results and discussion**

**
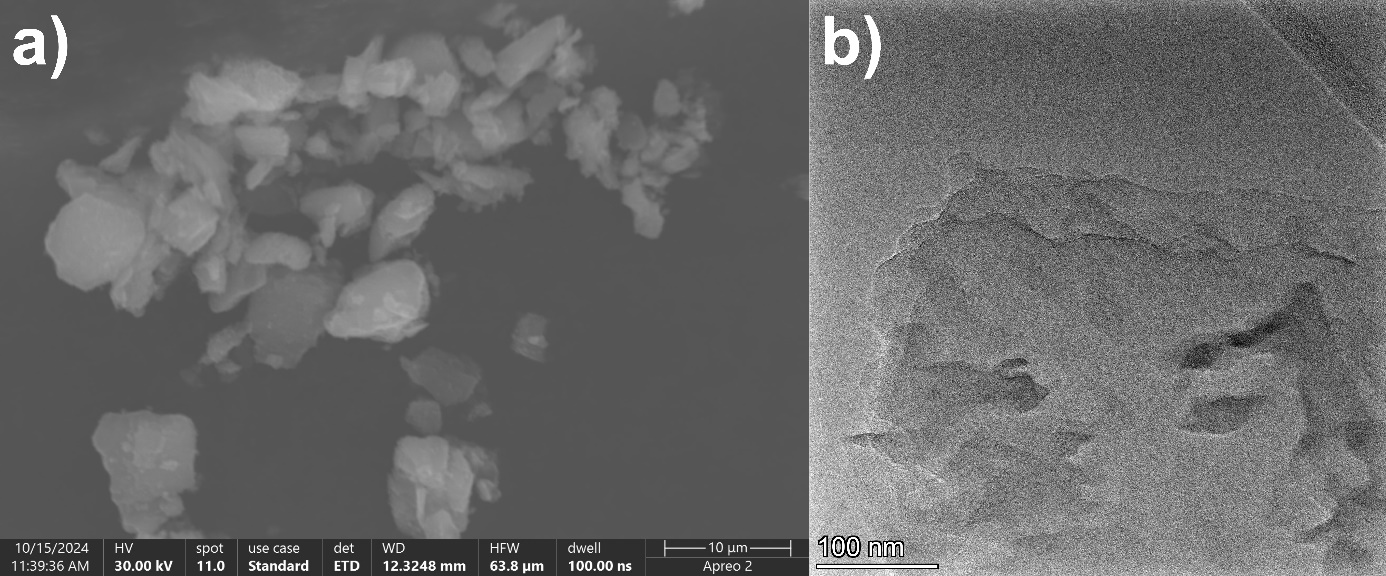
**

***Fig. S1.*** *(a) SEM and (b) TEM of graphitic carbon nitride (gCN).*

*
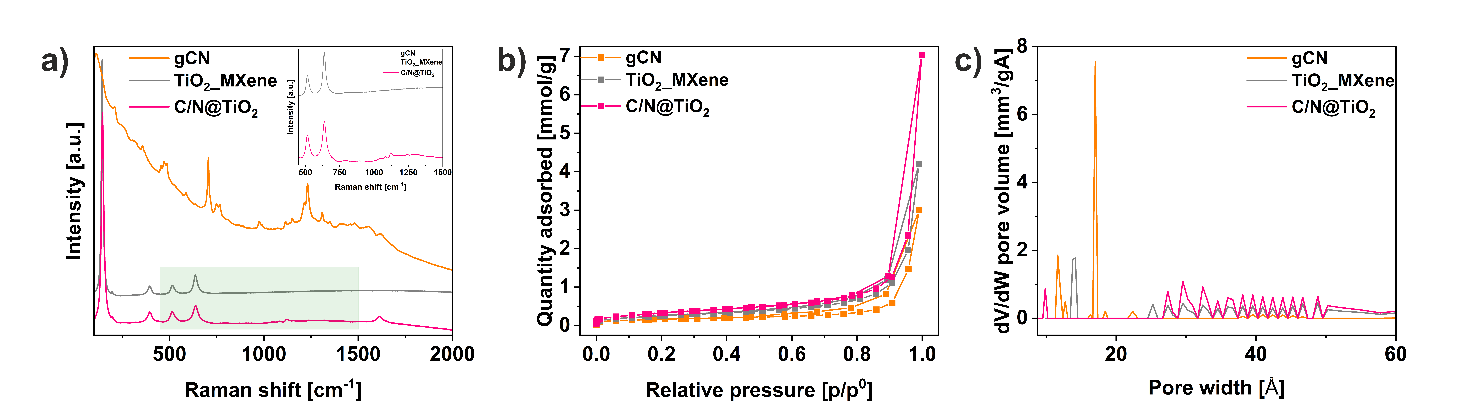
*

***Fig. S2.*** *(a) Raman spectra, (b) nitrogen adsorption-desorption isotherms, (c) pore size distribution of gCN, TiO2_MXene, and C/N@TiO2.*

*
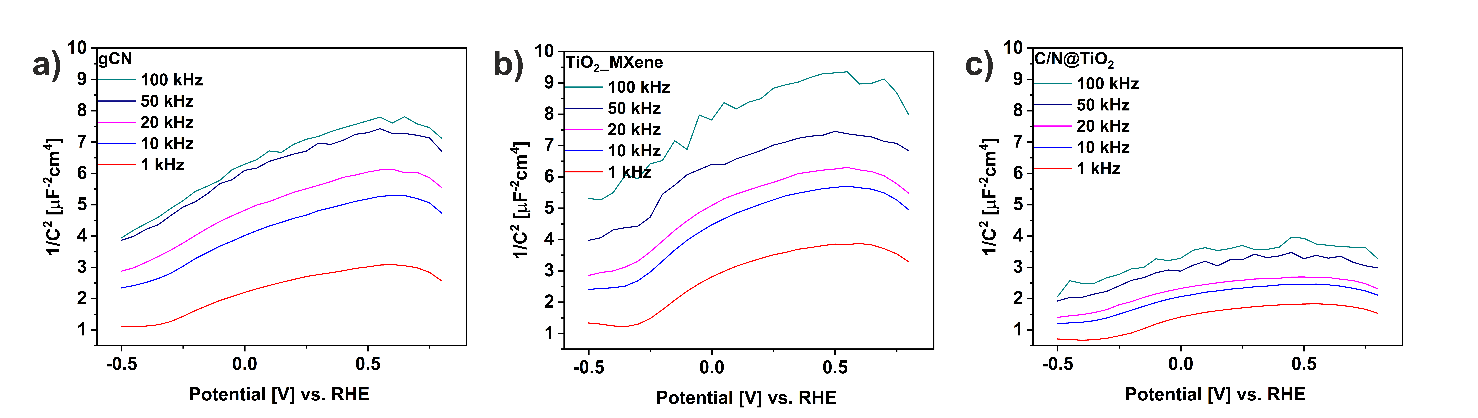
*

***Fig. S3.*** *Mott-Schottky plots of (a) gCN, (b) TiO2_MXene, and (c) C/N@TiO2 performed at different frequencies.*

*
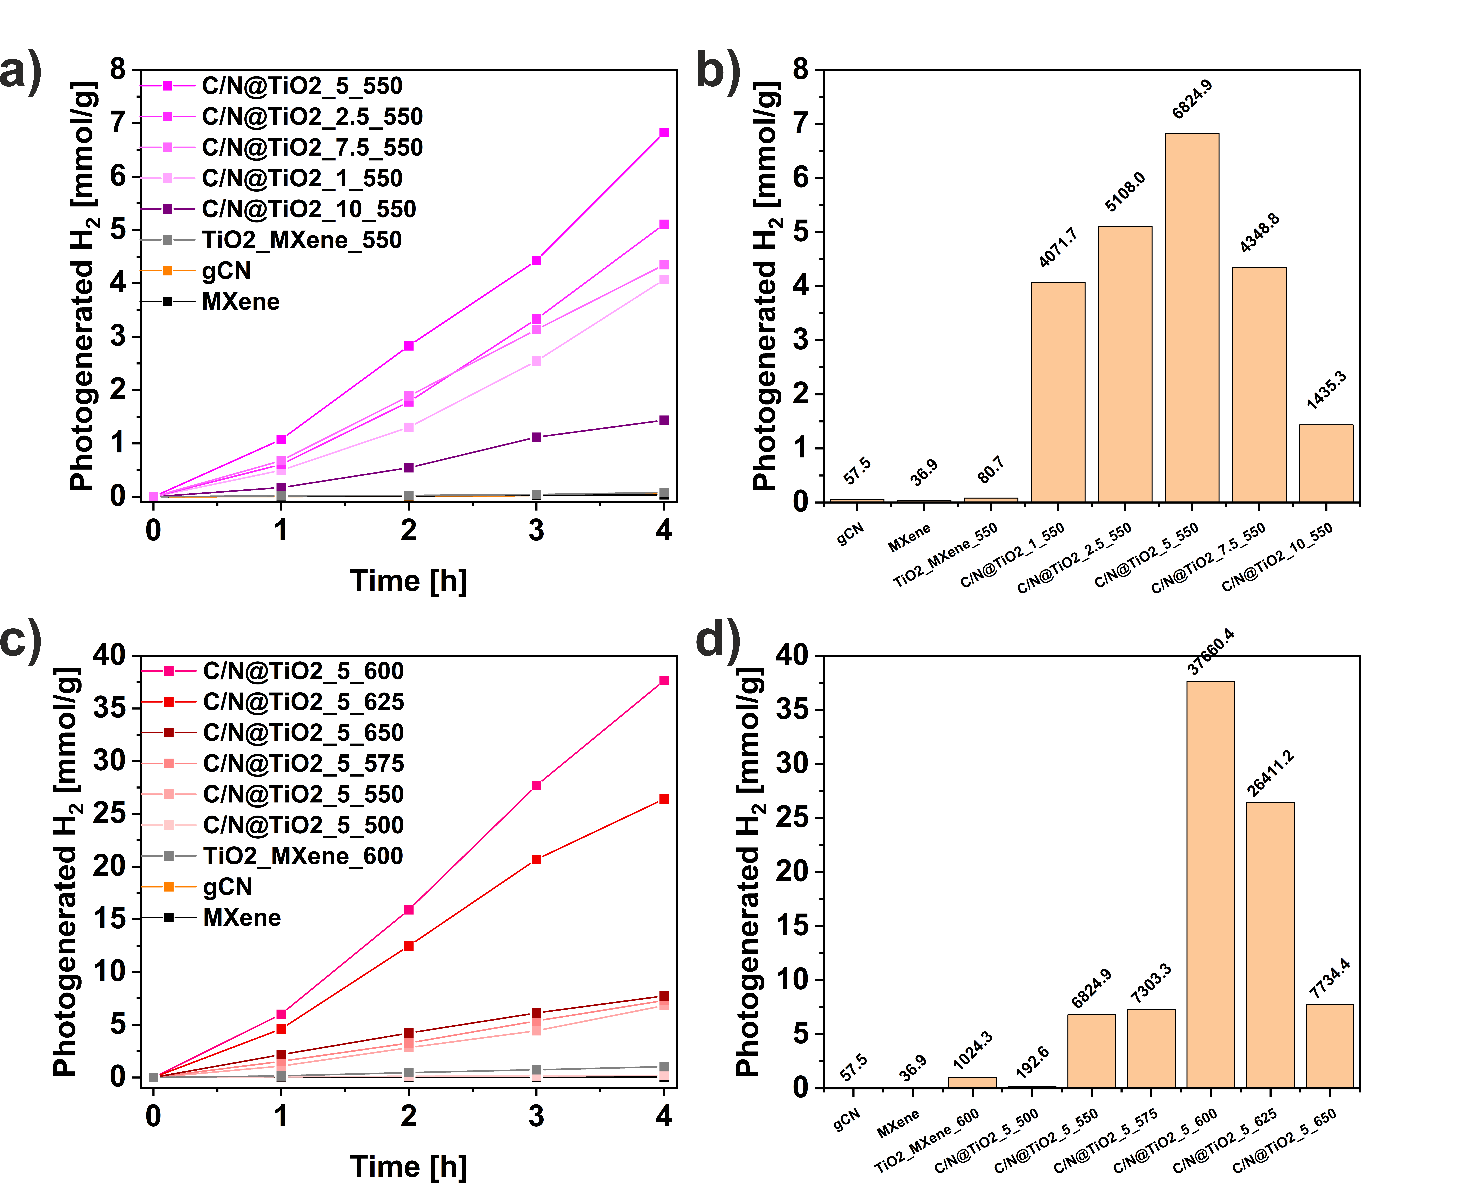
*

***Fig. S4.*** *Hydrogen evolution from water splitting catalyzed by (a) gCN, MXene, TiO2_MXene_550, C/N@TiO2_X_550 – amount dependence of MXene and gCN calcinated under air conditions at 550℃, (c) gCN, MXene, TiO2_MXene_600, and C/N@TiO2_5_T – temperature dependence of mixture of 5wt% MXene and 95wt% gCN calcinated under air conditions at different temperatures. Comparison of photogenerated hydrogen under simulated solar light exposure catalyzed by (b) gCN, MXene, TiO2_MXene_550, and C/N@TiO2_X_550 – amount dependence of MXene and gCN calcinated under air conditions at 550℃, (d) gCN, MXene, TiO2_MXene_600, and C/N@TiO2_5_T – temperature dependence of mixture of 55wt% MXene and 95wt% gCN calcinated under air conditions at different temperatures.*

*
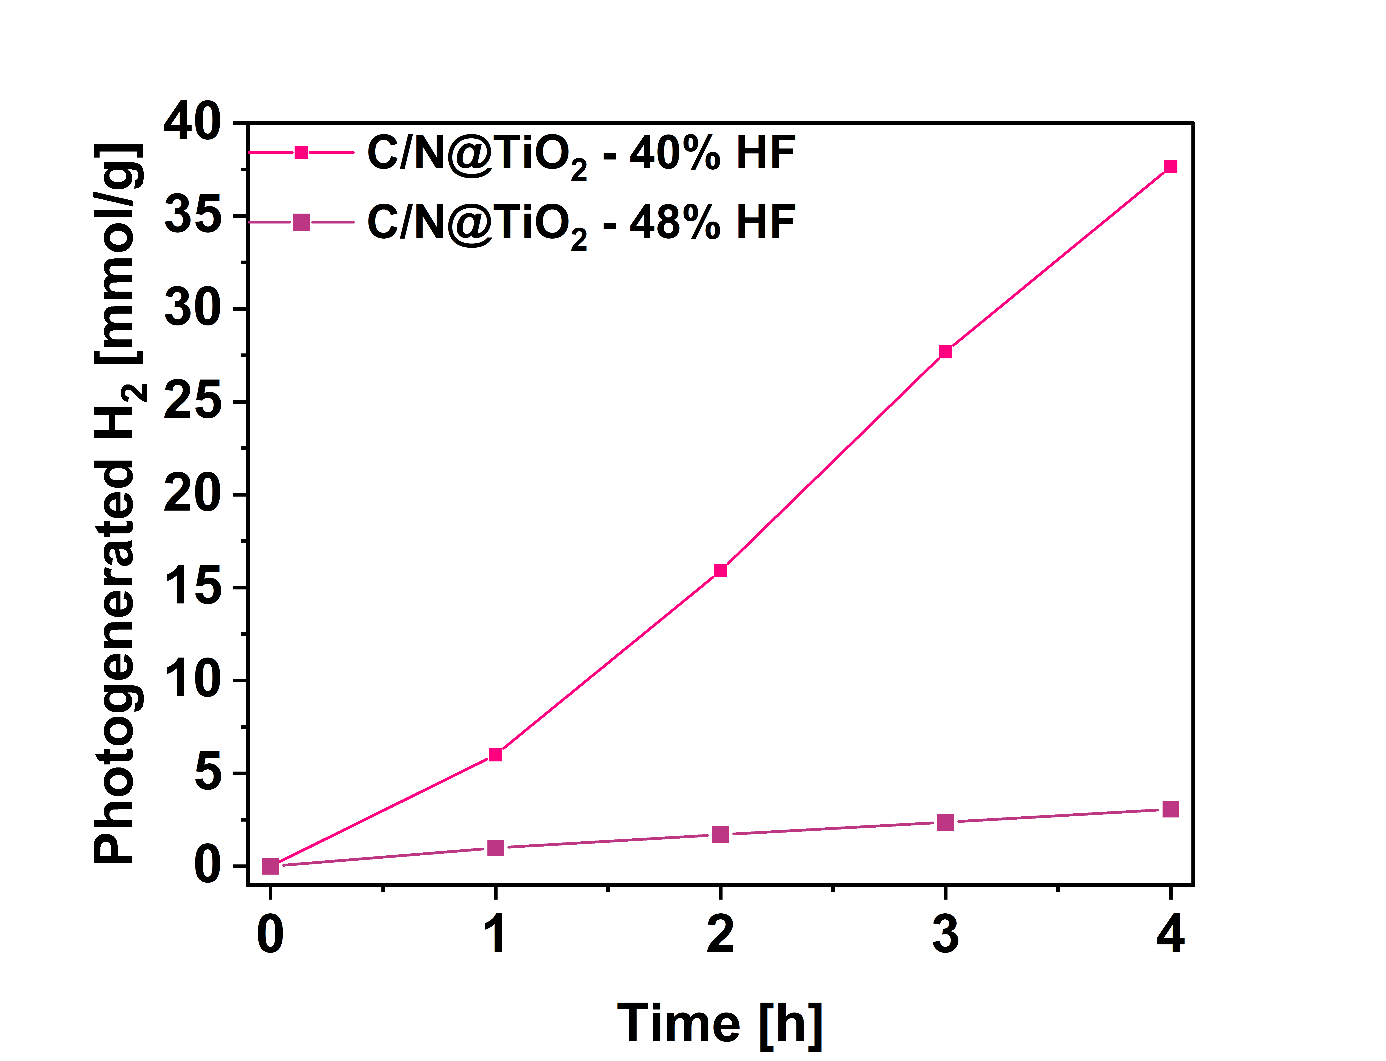
*

***Fig. S5.*** *Hydrogen evolution from water splitting catalyzed by C/N@TiO2 – 40 % HF and C/N@TiO2 – 48 % HF.*

***Table S1.*** *Comparison of performance of C/N@TiO2 toward photocatalytic H2 generation with other reported photocatalysts in the current state of the art.*

| ***Material*** | ***Energy bandgap [eV]*** | ***BET surface area [m2/g]*** | ***Parameters of photocatalytic H2 evolution reaction*** | | | | ***H2 production [µmol/h/g]*** | ***Ref.*** |
| --- | --- | --- | --- | --- | --- | --- | --- | --- |
| ***Lamp*** | ***Light*** | ***Sacrificial agent*** | ***Co-catalyst*** |
| ***C/N@TiO2*** | ***3.1*** | ***25*** | ***150 W Xe*** | ***simulated solar light*** | ***16 % TEOA*** | ***-*** | ***9415*** | ***This work*** |
| *C-TiO2/g-C3N4* | *-* | *129* | *300 W Xe* | *≥420 nm* | *10 % TEOA* | *2 wt% Pt* | *1409* | *4* |
| *C-TiO2/g-C3N4* | *2.6* | *80* | *300 W Xe* | *≥420 nm* | *10 % TEOA* | *2 wt% Pt* | *1146* | *S1* |
| *C-TiO2@g-C3N4* | *3.1* | *53* | *300 W Xe* | *≥420 nm* | *10 % methanol* | *-* | *36* | *S2* |
| *g-C3N4/Au/C-TiO2* | *2.9* | *-* | *300 W Xe* | *≥420 nm* | *10 % TEOA* | *-* | *129* | *S3* |
| *g-C3N4/TiO2* | *2.8* | *176* | *250 W* | *≥420 nm* | *10 % TEOA* | *-* | *1041* | *S4* |
| *B-TiO2/g-C3N4* | *2.7* | *97* | *300 W Xe* | *-* | *10 % TEOA* | *-* | *809* | *S5* |
| *d-Ti3C2/TiO2/g-C3N4* | *2.7* | *34* | *300 W Xe* | *≥420 nm* | *10 % TEOA* | *3 wt% Pt* | *1620* | *S6* |
| *g-C3N4-TiO2/rGO* | *2.6* | *-* | *250 W Xe* | *200-800 nm* | *5% glycerol* | *-* | *23143* | *S7* |
| *5% TEOA* | *8510* |
| *M-ZnS@g-C3N4/TiO2* | *3.1* | *374* | *300 W Xe* | *≥400 nm* | *10 % TEOA* | *-* | *422* | *S8* |
| *g-C3N4/Ti3C2 MXene* | *2.4* | *-* | *300 W Xe* | *≥420 nm* | *10 % TEOA* | *-* | *727* | *S9* |
| *g-C3N4@Ti3C2 QDs* | *2.6* | *40* | *300 W Xe* | *A.M. 1.5G* | *15 % TEOA* | *-* | *5112* | *S10* |
| *g-C3N4/Ti3CN MXene* | *2.0* | *-* | *300 W Xe* | *-* | *10 % TEOA* | *2 wt% Pt* | *7630* | *S11* |
| *g-C3N4/p-Ti3C2TX* | *2.5* | *-* | *350 W Xe* | *≥400 nm* | *10 % TEOA* | *-* | *18* | *S12* |
| *TiO­2/Ti3C2/g-C3N4* | *2.8* | *-* | *300 W Xe* | *-* | *10 % TEOA* | *-* | *1150* | *S13* |
| *Ti3C2 MXene-derived TiO2/g-C3N4* | *2.7* | *129* | *300 W Xe* | *-* | *10 % methanol* | *3 wt% Pt* | *11600* | *S14* |

**References**

[S1] C. Yang, J. Qin, Z. Xue, M. Ma, X. Zhang, R. Liu, Rational design of carbon-doped TiO2 modified g-C3N4 via in-situ heat treatment for drastically improved photocatalytic hydrogen with excellent photostability, Nano Energy, 41, 2017, 1-9, 10.1016/j.nanoen.2017.09.012.

[S2] Y. Zou, J.-W. Shi, D. Ma, Z. Fan, L. Lu, C. Niu, In situ synthesis of C-doped TiO2@g-C3N4 core-shell hollow nanospheres with enhanced visible-light photocatalytic activity for H2 evolution, Chemical Engineering Journal, 322, 2017, 435-444, 10.1016/j.cej.2017.04.056.

[S3] Y. Zou, J.-W. Shi, D. Ma, Z. Fan, C. Niu, L. Wang, [Fabrication of g-C3N4/Au/C-TiO2 Hollow Structures as Visible-Light-Driven Z-Scheme Photocatalysts with Enhanced Photocatalytic H2 Evolution](https://chemistry-europe.onlinelibrary.wiley.com/doi/10.1002/cctc.201700542), ChemCatChem, 2017, 9, 3752, 10.1002/cctc.201700542.

[S4] M.A. Alcudia-Ramos, M.O. Fuentez-Torres, F. Ortiz-Chi, C.G. Espinosa-González, N. Hernández‐Como, D.S. García-Zaleta, M.K. Kesarla, J.G. Torres-Torres, V. Collins-Martínez, S. Godavarthi, Fabrication of g-C3N4/TiO2 heterojunction composite for enhanced photocatalytic hydrogen production, Ceramics International, 46, 1, 2020, Pages 38-45, 10.1016/j.ceramint.2019.08.228.

[S5] J. Pan, Z. Dong, B. Wang, Z. Jiang, C. Zhao, J. Wang, C. Song, Y. Zheng, C. Li, The enhancement of photocatalytic hydrogen production via Ti3+ self-doping black TiO2/g-C3N4 hollow core-shell nano-heterojunction, Applied Catalysis B: Environmental, 242, 2019, 92-99, 10.1016/j.apcatb.2018.09.079.

[S6] M. Zhang, J. Qin, S. Rajendran, X. Zhang, R. Liu, [Heterostructured d-Ti3C2/TiO2/g-C3N4 Nanocomposites with Enhanced Visible-Light Photocatalytic Hydrogen Production Activity](https://chemistry-europe.onlinelibrary.wiley.com/doi/10.1002/cssc.201802284), ChemSusChem 2018, 11, 4226, 10.1002/cssc.201802284.

[S7] H. Y. Hafeez, S. K. Lakhera, S. Bellamkonda, G. R. Rao, M.V. Shankar, D.W. Bahnemann, B. Neppolian, Construction of ternary hybrid layered reduced graphene oxide supported g-C3N4-TiO2 nanocomposite and its photocatalytic hydrogen production activity, International Journal of Hydrogen Energy, 43, 8, 2018, 3892-3904, 10.1016/j.ijhydene.2017.09.048.

[S8] C. Zhang, Y. Zhou, J. Bao, J. Fang, S. Zhao, Y. Zhang, X. Sheng, W. Chen, Structure regulation of ZnS@g-C3N4/TiO2 nanospheres for efficient photocatalytic H2 production under visible-light irradiation, Chemical Engineering Journal, 346, 2018, 226-237, 10.1016/j.cej.2018.04.038.

[S9] H. Xu, R. Xiao, J. Huang, Y. Jiang, C. Zhao, X. Yang, In situ construction of protonated g-C3N4/Ti3C2 MXene Schottky heterojunctions for efficient photocatalytic hydrogen production, Chinese Journal of Catalysis, 42, 1, 2021, 107-114, 10.1016/S1872-2067(20)63559-8.

[S10] Y. Li, L. Ding, Y. Guo, Z. Liang, H. Cui, J. Tian,
Boosting the Photocatalytic Ability of g-C3N4 for Hydrogen Production by Ti3C2 MXene Quantum Dots, ACS Applied Materials & Interfaces, 2019, 11, 44, 41440-41447, 10.1021/acsami.9b14985.

[S11] F. Xu, Z. Li, D. Fan, C. Zhao, X. Yang, Construction of g-C3N4/Ti3CN MXene Schottky heterojunctions for boosting photocatalytic hydrogen production, Surfaces and Interfaces, 51, 2024, 104658, 10.1016/j.surfin.2024.104658.

[S12] F. Xu, D. Zhang, Y. Liao, G. Wang, X. Shi, H. Zhang, Q. Xiang, Synthesis and photocatalytic H2-production activity of plasma-treated Ti3C2Tx MXene modified graphitic carbon nitride, J Am Ceram Soc, 2020, 103, 849-858, [10.1111/jace.16798](https://doi.org/10.1111/jace.16798).

[S13] V. Q. Hieu, T. C. Lam, A. Khan, T.-T. T. Vo, T.-Q. Nguyen, V. D. Doan, D. L. Tran, V. T. Le, V. A. Tran, TiO2/Ti3C2/g-C3N4 ternary heterojunction for photocatalytic hydrogen evolution, Chemosphere, 285, 2021, 131429, 10.1016/j.chemosphere.2021.131429.

[S14] S. S. A. Shuaib, Y. Lu, Q. Wang, Y. Chen, M. Cai, Y. Wei, S. Sun, [Ti3C2 MXene-Derived TiO2/g-C3N4 Heterojunctions for Highly Efficient Photocatalytic H2 Generation](https://chemistry-europe.onlinelibrary.wiley.com/doi/10.1002/cctc.202402152), ChemCatChem 2025, e202402152, 10.1002/cctc.202402152.
